# Supplementary material for: 3D in situ imaging of the female reproductive tract reveals molecular signatures of fertilizing spermatozoa in mice
Source: eLife journal article supplement (doi:10.7554/elife.62043), 2020-10-20
Supplement: fig6-data2 [file Fig 6H right source data table.xlsx]

## Sheet: Fig 6H source data table
	Amp	DI	MI	UTJ		Table Analyzed	Data 1
Oviduct1	30.1	18.6	10.2	7.2
Oviduct2	25.6	20.2	15.4	2.1		Kruskal-Wallis test
Oviduct3	20.1	15.5	7.3	7.9		P value	0.0003
Oviduct4	15.4	15.2	9.7	5.5		Exact or approximate P value?	Exact
Average	22.8	17.375	10.65	5.675		P value summary	***
SEM	3.204	1.215	1.705	1.294		Do the medians vary signif. (P < 0.05)?	Yes
						Number of groups	4
						Kruskal-Wallis statistic	12
						Data summary
						Number of treatments (columns)	4
						Number of values (total)	16
