# Supplementary material for: 3D in situ imaging of the female reproductive tract reveals molecular signatures of fertilizing spermatozoa in mice
Source: eLife. 2020 Oct 20;9:e62043. doi: 10.7554/eLife.62043 (PMC7707823; doi:10.7554/eLife.62043)
Supplement: Figure 1—source data 1. — Raw data points for the quantification of protein levels for Figure 1G. [file elife-62043-fig1-data1.xlsx]

## Sheet: FL-CatSper1, Intact
								Compaired pairs	p-Value
	Relative levels of Intact FL-CatSper1							0 min vs 10 min	0.0374708	*
	Incubation	Rep1	Rep2	Rep3	Average	S.E.M		0 min vs 30 min	0.0152214	*
	0 min	0.954621	0.956872	0.952368	0.95462	0.00159238		0 min vs 60 min	0.00783525	**
	10 min	0.707217	0.223769	0.171028	0.367338	0.208966		10 min vs 30 min	0.01492	*
	30 min	0.456965	0.0702311	0.0200803	0.182426	0.169053		10 min vs 60 min	0.0305994	*
	60 min	0.329178	0.016728	0.00511299	0.117006	0.129993		30 min vs 60 min	0.0934125	ns

## Sheet: FL-CatSper1, Cleaved
								Compaired pairs	p-Value
	Relative levels of cleaved FL-CatSper1							0 min vs 10 min	0.00511742	**
	Incubation	Rep1	Rep2	Rep3	Average	S.E.M		0 min vs 30 min	0.0273255	*
	0 min	0.0453786	0.0431284	0.0476324	0.0453798	0.00159238		0 min vs 60 min	0.0342229	*
	10 min	0.176655	0.222328	0.184067	0.19435	0.0173321		10 min vs 30 min	0.0509914	ns
	30 min	0.299088	0.570649	0.331932	0.400556	0.104805		10 min vs 60 min	0.0897914	ns
	60 min	0.390867	0.457504	0.186732	0.345034	0.0997616		30 min vs 60 min	0.266233	ns

## Sheet: ND-CatSper1
									Compaired pairs	p-Value
	Relative levels of cleaved FL-CatSper1								0 min vs 10 min	0.42621	ns
	Total ND	Rep1	Rep2	Rep3	Rep4	average	SEM		0 min vs 30 min	0.48935	ns
	0 min	1	1	1	1	1	0		0 min vs 60 min	0.431476	ns
	10 min	0.607231	0.820666	1.52566	0.886192	0.959938	0.228347		10 min vs 30 min	0.420291	ns
	30 min	0.91317	0.431252	1.66953	0.956478	0.992607	0.294572		10 min vs 60 min	0.476271	ns
	60 min	0.723025	0.39446	1.61816	1.06784	0.95087	0.301931		30 min vs 60 min	0.273415	ns
