# Supplementary material for: 3D in situ imaging of the female reproductive tract reveals molecular signatures of fertilizing spermatozoa in mice
Source: eLife. 2020 Oct 20;9:e62043. doi: 10.7554/eLife.62043 (PMC7707823; doi:10.7554/eLife.62043)
Supplement: Figure 2—source data 1. — Raw data points of quantification of pY signals in the sperm from different regions of the reproductive tracts from five females at 8 hr post-coitus for Figure 2F. [file elife-62043-fig2-data1.xlsx]

## Sheet: Sperm count
		Ampulla			Middle Isthmus			UTJ
Animal	Side	pY +	pY -	Total	pY +	pY -	Total	pY +	pY -	Total
#1	Left	2	9	11	8	11	19	14	7	21
	Right	3	10	13	9	14	23	12	5	17
#2	Left	4	7	11	11	11	22	17	17	34
	Right	2	12	14	14	17	31	15	11	26
#3*	Left	0	5	5	4	5	9	9	4	13
#4	Left	0	0	0	3	3	6	19	7	26
	Right	3	2	5	2	3	5	7	6	13
#5	Left	4	16	20	17	24	41	16	9	25
	Right	5	11	16	7	9	16	13	3	16
Total		23	72	95	75	97	172	122	69	191
*Right side tract has cyst.

## Sheet: Percentage and Paired-t test
		Ampulla			Mid-isthmus			Close to UTJ					pY-neg	p-Value	Significance
Animal	Side	pY +	pY -	Total	pY +	pY -	Total	pY +	pY -	Total			Ampulla-Mid isthmus	0.0148115	*
#1	Left	0.181818	0.818182	1	0.421053	0.578947	1	0.666667	0.333333	1			Ampulla-Close to UTJ	0.00119715	**
	Right	0.230769	0.769231	1	0.391304	0.608696	1	0.705882	0.294118	1			Mid isthmus-Close to UTJ	0.000218475	***
#2	Left	0.363636	0.636364	1	0.5	0.5	1	0.5	0.5	1			*p<0.05; **p<0.01; ***p<0.001
	Right	0.142857	0.857143	1	0.451613	0.548387	1	0.576923	0.423077	1
#3*	Left	0	1	1	0.444444	0.555556	1	0.692308	0.307692	1
#4	Left	N/A	N/A	N/A	0.5	0.5	1	0.730769	0.269231	1
	Right	0.6	0.4	1	0.4	0.6	1	0.538462	0.461538	1
#5	Left	0.2	0.8	1	0.414634	0.585366	1	0.64	0.36	1
	Right	0.3125	0.6875	1	0.4375	0.5625	1	0.8125	0.1875	1
Average ± SEM (%)**		25.4 ± 6.7%	74.6 ± 6.7%a	1	44.0 ± 1.4%	56.0 ± 1.4%b	1	65.2 ± 3.5%	34.8 ± 3.5%c	1
*Right side tract has cyst. **Percentage of pY negative sperm cells between each part of female tract are statistically compared. Different letters indicate significant difference between the percentage of pY negative sperm in each region of female tract.

## Sheet: pY(-) KW-ANOVA & ANOVA
					KW-ANOVA
					Number of families	1
					Number of comparisons per family	3
					Alpha	0.05
					Dunn's multiple comparisons test	Mean rank diff.	Significant?	Summary	Adjusted P Value		Graph indication till p≤0.001***
					Ampulla vs. Middle Isthmus	6.778	No	ns	0.2096	A-B
					Ampulla vs. UTJ	16.22	Yes	****	<0.0001	A-C	***
					Middle Isthmus vs. UTJ	9.444	Yes	*	0.0346	B-C	*
					Test details	Mean rank 1	Mean rank 2	Mean rank diff.	n1	n2
					Ampulla vs. Middle Isthmus	21.67	14.89	6.778	9	9
					Ampulla vs. UTJ	21.67	5.444	16.22	9	9
					Middle Isthmus vs. UTJ	14.89	5.444	9.444	9	9
					ANOVA
					Number of families	1
					Number of comparisons per family	3
					Alpha	0.05
					Tukey's multiple comparisons test	Mean Diff.	95.00% CI of diff.	Significant?	Summary	Adjusted P Value		Graph indication till p≤0.001***
					Ampulla vs. Middle Isthmus	21.43	6.839 to 36.03	Yes	**	0.0034	A-B	**
					Ampulla vs. UTJ	42.58	27.98 to 57.17	Yes	****	<0.0001	A-C	***
					Middle Isthmus vs. UTJ	21.15	6.552 to 35.74	Yes	**	0.0038	B-C	**
					Test details	Mean 1	Mean 2	Mean Diff.	SE of diff.	n1	n2	q	DF
					Ampulla vs. Middle Isthmus	77.43	55.99	21.43	5.844	9	9	5.187	24
					Ampulla vs. UTJ	77.43	34.85	42.58	5.844	9	9	10.3	24
					Middle Isthmus vs. UTJ	55.99	34.85	21.15	5.844	9	9	5.117	24
