# Supplementary material for: 3D in situ imaging of the female reproductive tract reveals molecular signatures of fertilizing spermatozoa in mice
Source: eLife. 2020 Oct 20;9:e62043. doi: 10.7554/eLife.62043 (PMC7707823; doi:10.7554/eLife.62043)
Supplement: Figure 4—source data 1. — Raw data points of sperm count for quantification of CatSper1 integrity and acrosome state for Figure 4B. [file elife-62043-fig4-data1.xlsx]

## Sheet: CatSper1 Data
Animal	CatSper1	Ampulla	Isthmus
			Distal	Middle	Close to UTJ
#1	Intact	22	40	23	6				Number of families	1
	None	3	6	7	46				Number of comparisons per family	6
#2	Intact	20	21	44	3				Alpha	0.05
	None	3	5	12	51
#3	Intact	19	31	36	7				Tukey's multiple comparisons test	Mean Diff.	95.00% CI of diff.	Significant?	Summary	Adjusted P Value
	None	3	4	7	37				Ampulla vs. Distal	2.43	-6.678 to 11.54	No	ns	0.6259	A-B
#4	Intact	10	25	36	5				Ampulla vs. Middle	10.32	-6.018 to 26.65	No	ns	0.1551	A-C
	None	1	4	14	49				Ampulla vs. Close to UTJ	77.49	64.78 to 90.20	Yes	***	0.0002	A-D
									Distal vs. Middle	7.888	-5.130 to 20.90	No	ns	0.17	B-C
	CatSper1 Intact	71	117	139	21				Distal vs. Close to UTJ	75.06	70.77 to 79.35	Yes	****	<0.0001	B-D
	Total	81	136	179	204				Middle vs. Close to UTJ	67.17	56.54 to 77.81	Yes	***	0.0002	C-D
									Test details	Mean 1	Mean 2	Mean Diff.	SE of diff.	n1	n2	q	DF
	CatSper1 Intact	Ampulla	Isthmus						Ampulla vs. Distal	88.06	85.63	2.43	1.888	4	4	1.821	3
			Distal	Middle	Close to UTJ				Ampulla vs. Middle	88.06	77.74	10.32	3.385	4	4	4.31	3
	#1	0.88	0.869565	0.766667	0.115385				Ampulla vs. Close to UTJ	88.06	10.57	77.49	2.633	4	4	41.61	3
	#2	0.869565	0.807692	0.785714	0.0555556				Distal vs. Middle	85.63	77.74	7.888	2.698	4	4	4.135	3
	#3	0.863636	0.885714	0.837209	0.159091				Distal vs. Close to UTJ	85.63	10.57	75.06	0.889	4	4	119.4	3
	#4	0.909091	0.862069	0.72	0.0925926				Middle vs. Close to UTJ	77.74	10.57	67.17	2.204	4	4	43.1	3
	Average	0.880573	0.85626	0.777398	0.105656
	S.E.M	0.0116506	0.0195424	0.0280005	0.0250125

## Sheet: Acr-Data
Animal	PNA	Ampulla	Isthmus
			Distal	Middle	Close to UTJ
#1	Positive	9	29	22	40				Number of families	1
	Negative	16	17	8	12				Number of comparisons per family	6
#2	Positive	6	22	48	53				Alpha	0.05
	Negative	17	4	8	1
#3	Positive	5	23	25	35				Tukey's multiple comparisons test	Mean Diff.	95.00% CI of diff.	Significant?	Summary	Adjusted P Value
	Negative	17	12	18	9				Ampulla vs. Distal	-43.97	-75.45 to -12.48	Yes	*	0.0201	A-B
#4	Positive	8	23	44	49				Ampulla vs. Middle	-47.09	-77.23 to -16.95	Yes	*	0.0146	A-C
	Negative	17	6	6	5				Ampulla vs. Close to UTJ	-57.14	-87.92 to -26.35	Yes	**	0.0089	A-D
									Distal vs. Middle	-3.125	-22.87 to 16.62	No	ns	0.8665	B-C
	PNA+	28	97	139	177				Distal vs. Close to UTJ	-13.17	-15.99 to -10.35	Yes	***	0.0007	B-D
	Total	95	136	179	204				Middle vs. Close to UTJ	-10.05	-31.17 to 11.08	No	ns	0.2779	C-D
									Test details	Mean 1	Mean 2	Mean Diff.	SE of diff.	n1	n2	q	DF
	PNA +	Ampulla	Isthmus						Ampulla vs. Distal	29.21	73.17	-43.97	6.524	4	4	9.53	3
			Distal	Middle	Close to UTJ				Ampulla vs. Middle	29.21	76.3	-47.09	6.245	4	4	10.66	3
	#1	0.36	0.630435	0.733333	0.769231				Ampulla vs. Close to UTJ	29.21	86.34	-57.14	6.379	4	4	12.67	3
	#2	0.26087	0.846154	0.857143	0.981481				Distal vs. Middle	73.17	76.3	-3.125	4.091	4	4	1.08	3
	#3	0.227273	0.657143	0.581395	0.795455				Distal vs. Close to UTJ	73.17	86.34	-13.17	0.5852	4	4	31.82	3
	#4	0.32	0.793103	0.88	0.907407				Middle vs. Close to UTJ	76.3	86.34	-10.05	4.377	4	4	3.245	3
	Average	0.292036	0.731709	0.762968	0.863394
	S.E.M	0.0342648	0.0602619	0.0791709	0.0571201
